# Supplementary material for: Phlda3 regulates beta cell survival during stress
Source: PubMed Central journal article supplement (PMC6731300; doi:10.1038/s41598-019-49289-5), 2019-09-06
Supplement: 41598_2019_49289_MOESM1_ESM.pdf [file 41598_2019_49289_MOESM1_ESM.pdf]

## **Supplementary information**

### **Phlda3 regulates beta cell survival during stress**

Mohammed Bensellam<sup>1,2</sup>, Jeng Yie Chan<sup>1,3</sup>, Kailun Lee<sup>1</sup>, Mugdha V. Joglekar<sup>4</sup>, Anandwardhan A. Hardikar<sup>4</sup>, Thomas Loudovaris<sup>5</sup>, Helen E. Thomas<sup>5,6</sup>, Jean-Christophe Jonas<sup>2</sup> and D. Ross Laybutt<sup>1,3</sup>

<sup>1</sup> Garvan Institute of Medical Research, Sydney, NSW, Australia

<sup>2</sup> Université catholique de Louvain, Institut de recherche expérimentale et clinique, Pôle d'endocrinologie, diabète et nutrition, Brussels, Belgium

<sup>3</sup> St Vincent's Clinical School, UNSW Sydney, Sydney, NSW, Australia

<sup>4</sup> NHMRC Clinical Trials Centre, The University of Sydney, Sydney, NSW, Australia

<sup>5</sup> St Vincent's Institute of Medical Research, Fitzroy, Victoria, Australia

<sup>6</sup> St. Vincent's Hospital, The University of Melbourne, Fitzroy, Victoria, Australia

#### **Corresponding authors:**

Mohammed Bensellam

Université catholique de Louvain, Institut de recherche expérimentale et clinique, Pôle d'endocrinologie, diabète et nutrition, Brussels, Belgium.

Tel: 32-2-764-9586; Fax: 32-2-764-5532; Email: mohammed.bensellam@uclouvain.be

D. Ross Laybutt

Garvan Institute of Medical Research, 384 Victoria St, Darlinghurst, NSW 2010, Australia.

Tel: 61-2-9295-8228; Fax: 61-2-9295-8201; Email: r.laybutt@garvan.org.au

**Supplementary Table 1.** Characteristics of organ donors and islet preparations

| Donor           | Age | Gender | BMI  | Diabetes duration | Diabetes treatment                                                     | Comments                                                                                   | Cause of death                                                                                                                      | Islet purity | Cell viability |
|-----------------|-----|--------|------|-------------------|------------------------------------------------------------------------|--------------------------------------------------------------------------------------------|-------------------------------------------------------------------------------------------------------------------------------------|--------------|----------------|
| N-SVI-014-10    | 34  | M      | 30,6 | -                 | -                                                                      | No family history                                                                          | Prescription drug overdose<br>(28min downtime)                                                                                      | 65%          | 74%            |
| N-SVI-020-10    | 33  | F      | 31   | -                 | -                                                                      | No family history                                                                          | Suicide - Hanging<br>(45min downtime)                                                                                               | 80%          | ND             |
| N-SVI-032-10    | 40  | F      | 24,1 | -                 | -                                                                      | No family history                                                                          | Hypoxia<br>(35min downtime)                                                                                                         | 90%          | 71%            |
| N-SVI-042-10    | 65  | M      | 36,8 | -                 | -                                                                      | No family history                                                                          | Spontaneous subarachnoid<br>hemorrhage                                                                                              | 90%          | ND             |
| N-SVI-014-14    | 53  | M      | 30,2 | -                 | -                                                                      | No family history                                                                          | Cerebral hypoxia/ischemia<br>(34min downtime)                                                                                       | 70%          | 73%            |
| N-SVI-023-14    | 61  | F      | 31,9 | -                 | -                                                                      | No family history                                                                          | Cerebral infarction<br>(30min downtime)                                                                                             | 90%          | 96%            |
| N-SVI-040-14    | 39  | M      | 23,9 | -                 | -                                                                      | Grandfather T2D                                                                            | Cerebral hypoxia/ischemia<br>(0 min downtime)                                                                                       | 95%          | 83%            |
| N-SVI-011-16    | 61  | M      | 25,5 | -                 | -                                                                      | No family history                                                                          | Intracranial haemorrhage                                                                                                            | 95%          | 84%            |
| T2D- SVI-007-11 | 47  | M      | 30,9 | 12 years          | Diet controlled                                                        | Father T2D                                                                                 | Spontaneous subarachnoid<br>hemorrhage                                                                                              | 90%          | 85%            |
| T2D- SVI-001-12 | 44  | M      | 44,1 | Undiagnosed       | None                                                                   | Alcoholic with liver<br>cirrhosis, Father T2D<br>on Dialysis. Not T1D<br>no Autoantibodies | Spontaneous subarachnoid<br>hemorrhage                                                                                              | 70%          | ND             |
| T2D- SVI-005-14 | 57  | F      | 24,8 | <1 year           | Diet/exercise<br>controlled                                            | Father, Uncle, Sister<br>Insulin dependent<br>Diabetics                                    | Spontaneous subarachnoid<br>hemorrhage                                                                                              | 90%          | ND             |
| T2D- SVI-014-15 | 40  | M      | 30,4 | Undiagnosed       | None                                                                   | Mother T2D<br>Confirmed not T1D<br>no Autoantibodies                                       | Hypoxia secondary to<br>obstructive sleep apnea<br>+ community acquired<br>pneumonia vs.<br>meningoencephalitis<br>(35min downtime) | 75%          | 83%            |
| T2D- SVI-010-16 | 65  | M      | 37,2 | 15 years          | Oral hypoglycemic,<br>DIABEX (Metformin),<br>DIAMICRON<br>(Gliclazide) | Sister T2D                                                                                 | Cerebral infarction<br>(27min downtime)                                                                                             | 80%          | ND             |

F: Female, M: Male, N: Non-diabetic, ND: Not determined, T2D: Type 2 diabetes

**Supplementary Table 2.** Characteristics of the three non-diabetic organ donors and their islet preparations

| Donor | Age | Gender | BMI  | Islet purity | Cell viability |
|-------|-----|--------|------|--------------|----------------|
| 1     | 62  | F      | 29.3 | 90%          | 95%            |
| 2     | 58  | M      | 27.2 | 80%          | 90%            |
| 3     | 50  | F      | 28.8 | 95%          | Not done       |

F: Female, M: Male

**Supplementary Table 3.** Sequences of oligonucleotide primers (5'-3')

| Gene symbol                            | 5' Oligonucleotide        | 3' Oligonucleotide        |
|----------------------------------------|---------------------------|---------------------------|
| <i>Cyclophilin (Cypa, Ppia)</i>        | TGTGCCAGGGTGGTGA CTTTAC   | TGGGAACCGTTTGTGTTTGG      |
| <i>Ddit3 (Chop, Gadd153)</i>           | TTCACTACTCTTGACCCTGCGTC   | CACTGACCACTCTGTTTCCGTTTC  |
| <i>Dnajc3 (p58<sup>IPK</sup>)</i>      | AAGCCCGTGGAAGCCATTAG      | GGTCATTTTCATTGTGCTCCTGAG  |
| <i>Fkbp11</i>                          | ACACGCTCCACATACTACACGG    | ATGACTGCTCTTCGCTTCTCTCCC  |
| <i>Gpx1</i>                            | ACAGTCCACCGTGTATGCCTTC    | CTTTCATTCTTGCCATTCTCCTG   |
| <i>Glut2 (Slc2a2)</i>                  | CATTCTTTGGTGGGTGGC        | CCTGAGTGTGTTTGGAGCG       |
| <i>Hmox1 (HO-1, Hsp32)</i>             | CCACACAGCACTATGTAAAGCGTC  | GTTCCGGAAGGTAAAAAAGCC     |
| <i>Hspa5 (Bip, Grp78)</i>              | AGGACAAGAAGGAGGATGTGGG    | ACCGAAGGGTCATTCCAAGTG     |
| <i>Hsp90b1 (Grp94)</i>                 | AAACGGCAACACTTCGGTCAG     | GCATCCATCTCTTCTCCCTCATC   |
| <i>Id1</i>                             | TTGGTCTGTCGGAGCAAAGC      | GCAGGTCCCTGATGTAGTCGATTAC |
| <i>Il1<math>\beta</math></i>           | TGTTCTTTGAAGTTGACGGACCC   | CCACAGCCACAATGAGTGATACTG  |
| <i>iNos (Nos2)</i>                     | GCACCTTGGAAGAGGAGCAACTAC  | TGCGGCTGGACTTTTCACTC      |
| <i>Ikb<math>\alpha</math> (Nfkbia)</i> | ACCCCTCTACATCTTGCCTGTGAG  | CGTTGACATCAGCACCCAAAG     |
| <i>Mafa</i>                            | CGTCAACGACTTCGACCTGATG    | ATCCTCCAGCACCGCTTTTC      |
| <i>p21 (Cdkn1a, Waf1)</i>              | CTTGTCGCTGTCTTGCACCTCTG   | CTTCAGGGTTTTCTCTTG CAGAAG |
| <i>Pdia4 (Erp72)</i>                   | AGTCAAGGTGGTGGTGGGAAAG    | TGGGAGCAA AATAGATGGTAGGG  |
| <i>Phlda3</i>                          | CACATCTACTTCACGCTAGTGACCG | GTTGATTCTTGA ACTTGACCAGGC |
| <i>Srxn1</i>                           | TACCAATCGCCGTGCTCATC      | AAAGGAATAGTAGTAGTCGCCACCC |
| <i>Trb3</i>                            | TCTTCAGCAACTGTGAGAGGACG   | TCCAGACATCAGCCGCTTTG      |
| <i>Xbp1</i>                            | GCAGCAAGTGGTGGATTTGG      | AGATGTTCTGGGGAGGTGACAAC   |

Aliases of gene symbols given in parentheses

Control

 $H_2O_2$  50  $\mu$ M

Preparation 1

PHLDA3

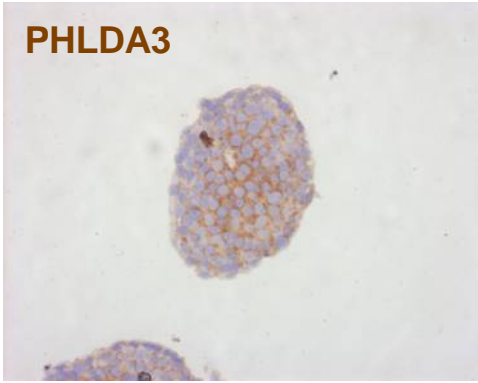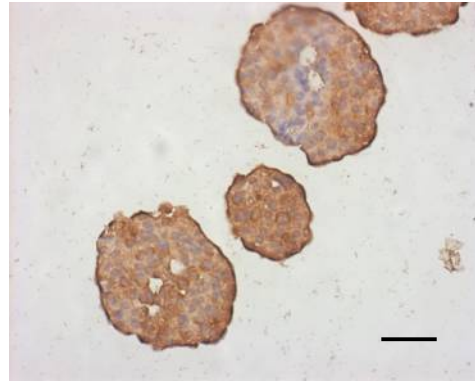

Preparation 2

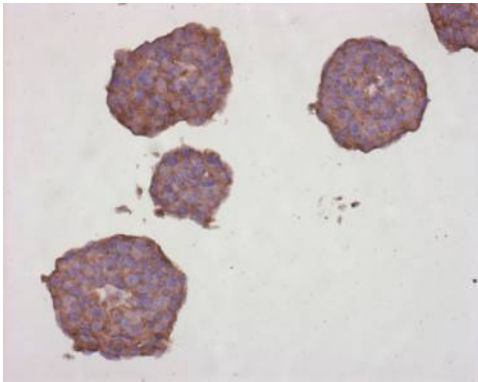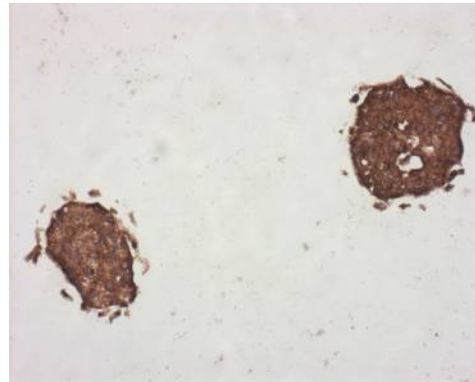

Preparation 3

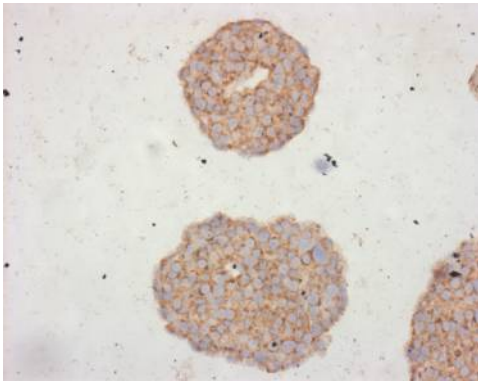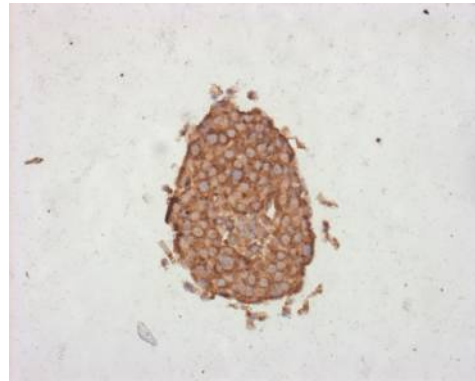

### Supplementary Figure 1. PHLDA3 immunostaining in $H_2O_2$ -treated human islets

Human islets from 3 different preparations were cultured in the absence or presence of 50  $\mu$ mol/l  $H_2O_2$  for 24h. At the end of culture, islets were fixed, embedded in paraffin and sections prepared for assessment of PHLDA3 expression. The representative images shown in Fig. 4g are from preparation 1. These images show the upregulation of PHLDA3 immunostaining throughout  $H_2O_2$ -treated islets in both beta and non-beta cells. Scale bar, 50  $\mu$ m.

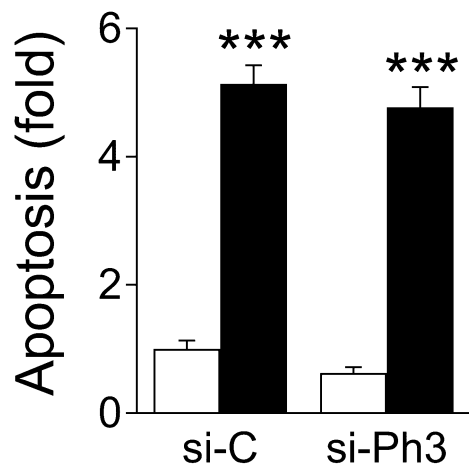

**Supplementary Figure 2. Effect of *Phlda3* knockdown on hypoxia-induced apoptosis**

MIN6 cells transfected with either control siRNA (si-C) or siRNA against *Phlda3* (si-Ph3) were cultured in the presence of normoxia (20% O<sub>2</sub>; white bars) or hypoxia (1% O<sub>2</sub>; grey bars) for 24h. Changes in apoptosis levels were normalized to DNA content. Data are means±SEM for 3 experiments. \*\*\* $p < 0.001$  vs normoxia. (two-way ANOVA+test of Bonferroni).
